# Supplementary material for: Genome-wide analysis of DNA replication and DNA double-strand breaks using TrAEL-seq
Source: PubMed Central journal article supplement (PMC8021198; doi:10.1371/journal.pbio.3000886), 2021-03-24

Centromeres replicated left to right

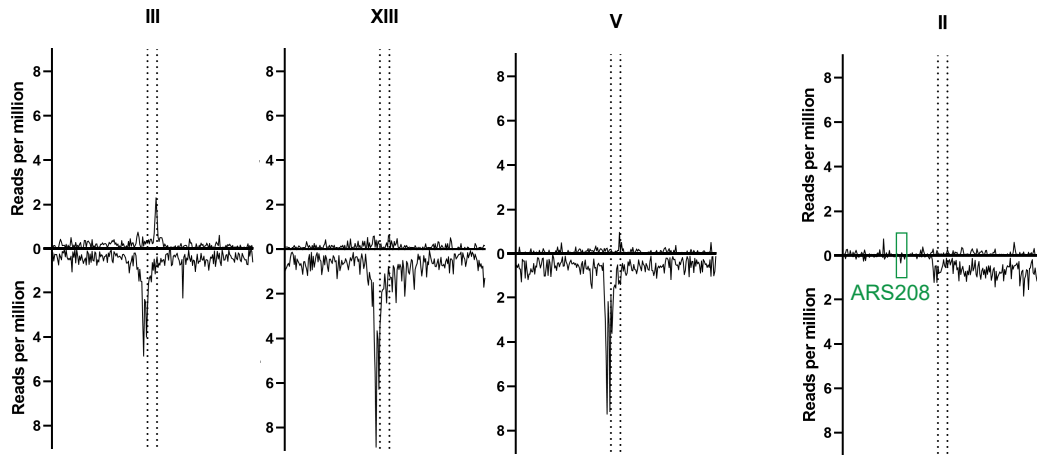

Centromeres replicated right to left

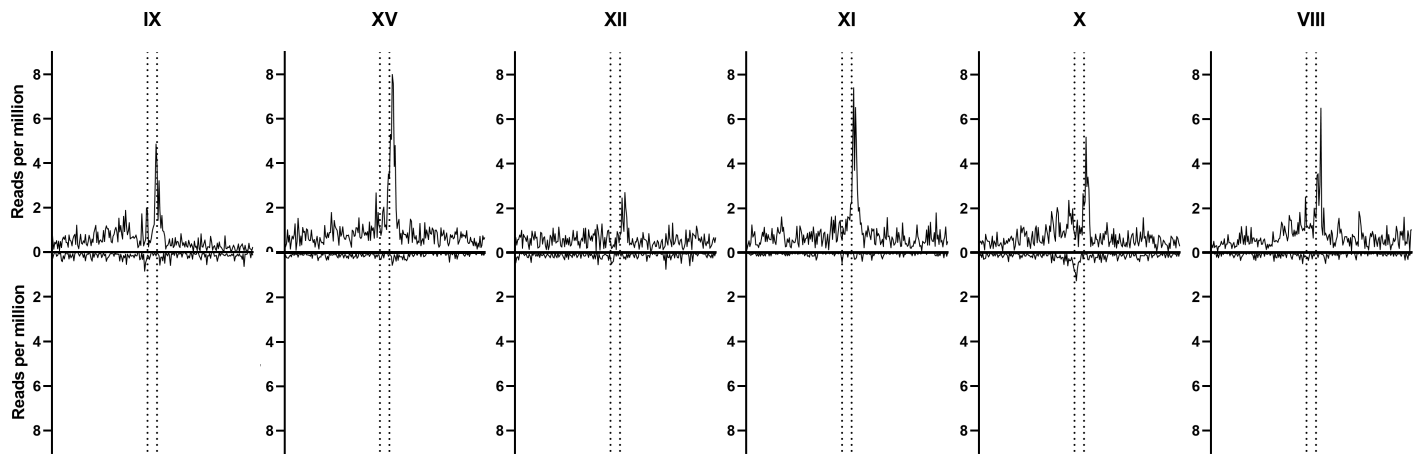

Centromeres replicated in both directions

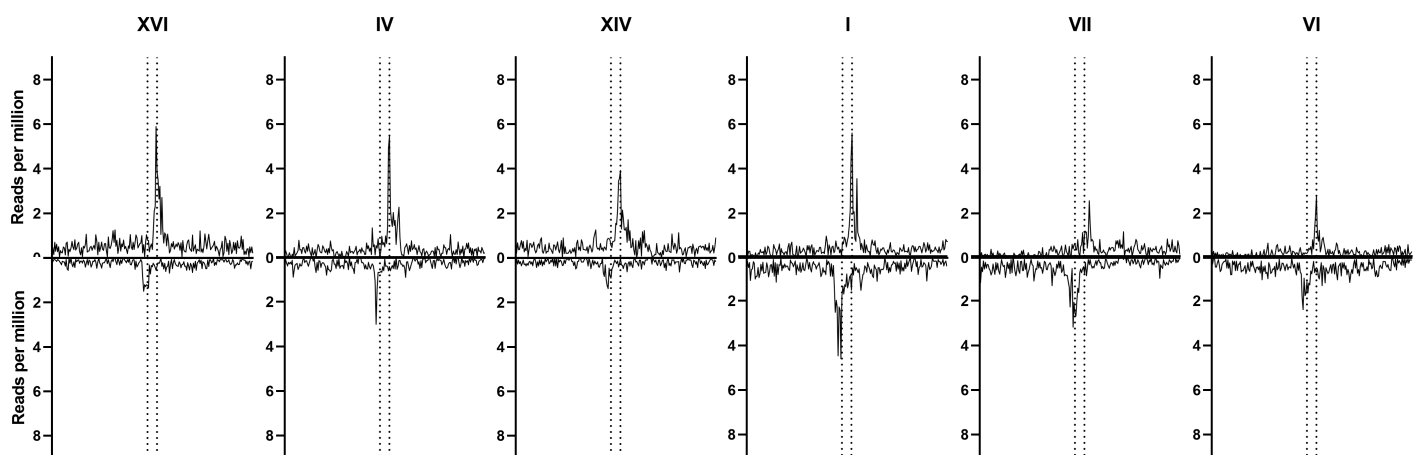

Supplement: pbio.3000886.s008.pdf [file pbio.3000886.s008.pdf]
