# Supplementary material for: Genome-wide analysis of DNA replication and DNA double-strand breaks using TrAEL-seq
Source: PubMed Central journal article supplement (PMC8021198; doi:10.1371/journal.pbio.3000886), 2021-03-24
Supplement: pbio.3000886.s017.pdf [file pbio.3000886.s017.pdf]

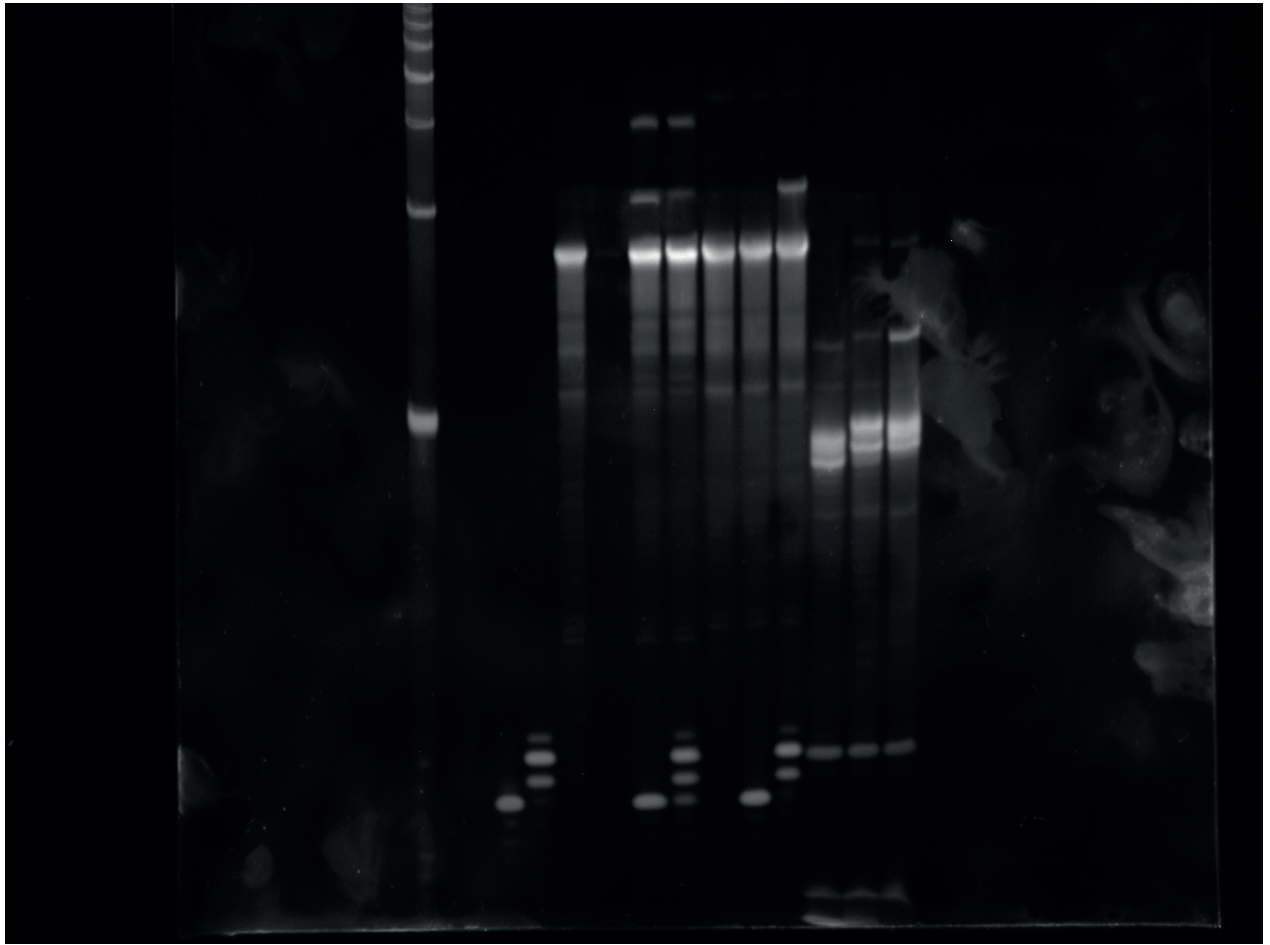

Lanes 1-3 and 7-9 are used in Fig. 1B

Lanes 5,6 are a different a different method we also trialed

Lanes 10-12 are tests of the USER cleavage of the adaptor
